# Supplementary material
Source: HighWire-hosted journal article supplement (https://bmjopen.bmj.com/content/12/8/e065489)
Supplement: inline-supplementary-material-2 [file inline-supplementary-material-2.pdf]

**Search date (Jan 14<sup>th</sup>, 2022)****Appendix 1. Cochrane Library search strategy** (<https://www.cochranelibrary.com/>)

- #1. ("suicidal ideation" OR "suicide ideation" OR "suicidal attempt" OR "suicide attempt" OR "attempted suicide" OR parasuicide OR "self harm" OR "self injury" OR "self injuries" OR "self mutilation" OR "self hurt" OR "self cut" OR "self poisoning" OR "self hitting" OR non-suicidal OR nonsuicidal OR "self-injurious" OR "self-destructive" OR "self directed violence" OR "self inflicted"):ti,ab,kw
- #2. MeSH descriptor: [Self-Injurious Behavior] explode all trees
- #3. #1 OR #2
- #4 Limit to Cochrane Reviews

**Appendix 2. JBI (Joanna Briggs Institute) EBP (Evidence-based Practice) Database(Evidence Synthesis) search strategy** (<https://jbi.global/products#database>)

- #1. ("suicidal ideation" OR "suicide ideation" OR "suicidal attempt" OR "suicide attempt" OR "attempted suicide" OR parasuicide OR "self harm" OR "self injury" OR "self injuries" OR "self mutilation" OR "self hurt" OR "self cut" OR "self poisoning" OR "self hitting" OR non-suicidal OR nonsuicidal OR "self-injurious" OR "self-destructive" OR "self directed violence" OR "self inflicted"). All Fields
- #2. (parents OR father OR mother OR carers OR caregivers OR "care givers" OR grandparents OR grand-parents OR guardians OR family OR familial OR families OR home OR household OR house-hold).All Fields
- #3. #1 AND #2

**Appendix 3. PROSPERO(International prospective register of systematic reviews) search strategy** (<https://www.crd.york.ac.uk/prospERO/>)

- #1. MeSH DESCRIPTOR Self-Injurious Behavior EXPLODE ALL TREES AND (Systematic Review OR Qualitative synthesis): RT

**Appendix 4. PubMed search strategy**

- #1. parent\*[tiab] OR father\*[tiab] OR mother\*[tiab] OR carer\*[tiab] OR caregiver\*[tiab] OR "care giver\*[tiab] OR grandparent\*[tiab] OR grand-parent\*[tiab] OR grandfather\*[tiab] OR grandmother\*[tiab] OR guardian\*[tiab] OR family[tiab] OR familial[tiab] OR families[tiab] OR home\*[tiab] OR household\*[tiab] OR house-hold\*[tiab]
- #2. Parents[mh] OR Fathers[mh] OR Mothers[mh] OR Family[mh] OR Caregivers[mh] OR legal guardians[mh] OR Family Relations[mh] OR Parent-Child Relations[mh] OR Father-Child Relations[mh] OR Mother-Child Relations[mh] OR Parenting[mh]
- #3. #1 OR #2
- #4. "young adult\*[tiab] OR "young people"[tiab] OR "young person\*[tiab] OR youngster\*[tiab] OR youth\*[tiab] OR juvenile\*[tiab] OR teen\*[tiab] OR preteen\*[tiab] OR child\*[tiab] OR minor\*[tiab] OR adolescen\* [tiab] OR pubescen\*[tiab] OR student\*[tiab] OR underage\*[tiab] OR "under age\*[tiab]
- #5. Child[mh] OR Adolescent[mh] OR Young Adult[mh] OR Psychology, Child[mh] OR Adolescent Development[mh] OR Psychology, Adolescent[mh] OR Adolescent Psychiatry[mh] OR Adolescent Behavior[mh]

#6. #4 OR #5

#7. "suicide ideation"[tiab] OR "suicidal ideation"[tiab] OR "suicide attempt"[tiab] OR "suicidal attempt"[tiab] OR parasuicid\*[tiab] OR para-suicid\*[tiab] OR nonsuicid\*[tiab] OR non-suicid\*[tiab] OR overdos\*[tiab] OR "over dose"[tiab] OR "self harm"[tiab] OR "self hurt"[tiab] OR "self mutilat"[tiab] OR "self injur"[tiab] OR "self damag"[tiab] OR "self inflict"[tiab] OR "self destruct"[tiab] OR "self violen"[tiab] OR "self directed violen"[tiab] OR "self immolat"[tiab] OR "self poison"[tiab] OR "auto mutilat"[tiab] OR automutilat\*[tiab] OR "self cut"[tiab] OR "self burn"[tiab] OR "self bit"[tiab] OR "self abus"[tiab] OR "self hit"[tiab] OR "head bang"[tiab] OR headbang\*[tiab] OR "self wound"[tiab]

#8. Self-Injurious Behavior[mh] OR Drug Overdose[mh]

#9. #7 OR #8

#10. qualitative[tiab] OR interview[tiab] OR interviews[tiab] OR experience[tw] OR experiences[tw]

#11. Qualitative Research[mh] OR interviews[mh] OR interviews[mh:noexp]

#12. #10 OR #11

#13. #3 AND #6 AND #9 AND #12

#14. Limit to English and Chinese

2328 records retrieved

## Appendix 5. EMBASE search strategy

#1. 'parent':ti,ab OR 'parents':ti,ab OR 'father\*':ti,ab OR 'mother\*':ti,ab OR 'carer\*':ti,ab OR 'caregiver\*':ti,ab OR 'care giver\*':ti,ab OR 'grandparent\*':ti,ab OR 'grand-parent\*':ti,ab OR 'grandfather\*':ti,ab OR 'grandmother\*':ti,ab OR 'guardian\*':ti,ab OR 'family':ti,ab OR 'familial':ti,ab OR 'families':ti,ab OR 'home':ti,ab OR 'household':ti,ab OR 'household':ti,ab

#2. 'parent'/exp OR 'caregiver'/exp OR 'grandparent'/exp OR 'guardian'/exp OR 'home'/exp OR 'family'/exp OR 'household'/exp OR 'family relation'/exp

#3. #1 OR #2

#4. 'prime adult':ti,ab OR 'prime adults':ti,ab OR 'young adult\*':ti,ab OR 'young people':ti,ab OR 'young person\*':ti,ab OR youngster\*:ti,ab OR 'youth\*':ti,ab OR 'juvenile\*':ti,ab OR teen\*:ti,ab OR preteen\*:ti,ab OR 'child':ti,ab OR 'children':ti,ab OR 'minor':ti,ab OR 'minors':ti,ab OR 'adolescent\*':ti,ab OR 'pubescen\*':ti,ab OR 'student\*':ti,ab OR 'under age\*' OR underage\*:ti,ab OR 'dependants':ti,ab OR 'dependents':ti,ab

#5. 'young adult'/exp OR 'juvenile'/exp OR 'child'/exp OR 'minor (person)'/exp OR 'adolescent'/exp OR 'student'/exp OR 'child psychology'/exp

#6. #4 OR #5

#7. 'suicid\* ideation':ti,ab OR 'suicid\* attempt':ti,ab OR 'parasuicide\*':ti,ab OR 'para-suicide\*':ti,ab OR 'nonsuicid\*':ti,ab OR 'non-suicid\*':ti,ab OR 'overdos\*':ti,ab OR 'over dos\*':ti,ab OR 'artificial skin lesion':ti,ab OR 'self harm\*':ti,ab OR 'self hurt\*':ti,ab OR 'self mutilat\*':ti,ab OR 'self injur\*':ti,ab OR 'self damag\*':ti,ab OR 'self inflicted':ti,ab OR 'self-destruct\*':ti,ab OR 'self violen\*':ti,ab OR 'self directed violence':ti,ab OR 'self immolat\*':ti,ab OR 'self poison\*':ti,ab OR 'auto mutilation':ti,ab OR 'automutilation':ti,ab OR 'self cut\*':ti,ab OR 'self burn\*':ti,ab OR 'self bit\*':ti,ab OR 'self abus\*':ti,ab OR 'self

- hit\*:ti,ab OR 'head bang\*:ti,ab OR 'headbang\*:ti,ab OR 'self wound\*:ti,ab OR 'selfharm\*:ti,ab OR 'selfinflicted injury\*:ti,ab OR 'selfinflicted wounds\*:ti,ab OR 'selfinjuring behavio\$:ti,ab OR 'selfinjurious behavio\$:ti,ab OR 'selfinjury\*:ti,ab OR 'selfmutilation\*:ti,ab
- #8. 'self immolation'/exp OR 'self poisoning'/exp OR 'suicidal ideation'/exp OR 'suicide attempt'/exp OR 'drug overdose'/exp OR 'nonsuicidal self injury'/exp OR 'automutilation'/exp
- #9. #7 OR #8
- #10. interview:ti,ab,kw OR interviews:ti,ab,kw OR qualitative:ti,ab,kw OR experience OR experiences
- #11. 'interview'/exp OR 'qualitative'/exp OR 'qualitative research'/exp OR 'experience'/exp
- #12. #10 OR #11
- #13. #3 AND #6 AND #9 AND #12
- #14. Limit Publication types to article, review, and article in press, excluding conference abstract, conference paper, note, conference review, letter, short survey, editorial, and book chapter.
- 1910 records retrieved

#### Appendix 6. CINAHL search strategy (EBSCO host)

- S1. AB ("parent\*" OR father\* OR mother\* OR carer\* OR caregiver\* OR "care giver\*" OR grandparent\* OR grand-parent\* OR grandfather\* OR grandmother\* OR guardian\* OR family OR familial OR families OR home\* OR household\* OR house-hold\*) OR TI ("parent\*" OR father\* OR mother\* OR carer\* OR caregiver\* OR "care giver\*" OR grandparent\* OR grand-parent\* OR grandfather\* OR grandmother\* OR guardian\* OR family OR familial OR families OR home\* OR household\* OR house-hold\*)
- S2. (MH "Parents+") OR (MH "Parental Attitudes+") OR (MH "Family+") OR (MH "Adult-Child Relations") OR (MH "Guardianship, Legal+") OR (MH "Caregivers")
- S3. S1 OR S2
- S4. AB ("young adult\*" OR "young people" OR "young person\*" OR youngster\* OR youth\* OR juvenile\* OR teen\* OR preteen\* OR child\* OR minor\* OR adolescen\* OR pubescen\* OR student\* OR underage\* OR "under age\*") OR TI ("young adult\*" OR "young people" OR "young person\*" OR youngster\* OR youth\* OR juvenile\* OR teen\* OR preteen\* OR child\* OR minor\* OR adolescen\* OR pubescen\* OR student\* OR underage\* OR "under age\*")
- S5. (MH "Child") OR (MH "Adolescence+") OR (MH "Minors (Legal)") OR (MH "Young Adult") OR (MH "Adult Children") OR (MH "Students+") OR (MH "Adolescent Development") OR (MH "Adolescent Psychology") OR (MH "Child Psychology") OR (MH "Adolescent Psychiatry") OR (MH "Adolescent Behavior")
- S6. S4 OR S5
- S7. AB (parasuicid\* OR para-suicid\* OR nonsuicid\* OR non-suicid\* OR overdos\* OR "over dose\*" OR "self harm\*" OR "self hurt\*" OR "self mutilat\*" OR "self injur\*" OR "self damag\*" OR "self inflict\*" OR "self destruct\*" OR "self violen\*" OR "self-directed violen\*" OR "self immolat\*" OR "self poison\*" OR "auto mutilat\*" OR automutilat\* OR "self cut\*" OR "self burn\*" OR "self bit\*" OR "self abus\*" OR "self hit\*" OR "head bang\*")

OR headbang\* OR "self wound\*" ) OR TI (parasuicid\* OR para-suicid\* OR nonsuicid\* OR non-suicid\* OR overdos\* OR "over dose\*" OR "self harm\*" OR "self hurt\*" OR "self mutilat\*" OR "self injur\*" OR "self damag\*" OR "self inflict\*" OR "self destruct\*" OR "self violen\*" OR "self-directed violen\*" OR "self immolat\*" OR "self poison\*" OR "auto mutilat\*" OR automutilat\* OR "self cut\*" OR "self burn\*" OR "self bit\*" OR "self abus\*" OR "self hit\*" OR "head bang\*" OR headbang\* OR "self wound\*")

S8. (MH "Suicide, Attempted") OR (MH "Suicidal Ideation") OR (MH "Overdose+") OR (MH "Injuries, Self-Inflicted") OR (MH "Self-Injurious Behavior")

S9. S7 OR S8

S10. AB ("qualitative" OR "interview" OR "interviews") OR TI ("qualitative" OR "interview" OR "interviews") OR TX "experience" TX "experiences")

S11. (MH "Qualitative Studies+") OR (MH "Interviews+") OR (MH "Structured Interview") OR (MH "Semi-Structured Interview")

S12. S10 OR S11

S13. S3 AND S6 AND S9 AND S12

S14. Limit to English and Chinese

679 records retrieved

#### Appendix 7. PsycINFO search strategy (EBSCO host)

S1. TI (parent\* OR father\* OR mother\* OR carer\* OR caregiver\* OR "care giver\*" OR grandparent\* OR grand-parent\* OR grandfather\* OR grandmother\* OR guardian\* OR family OR familial OR families OR home\* OR household\* OR house-hold\*)

S2. AB (parent\* OR father\* OR mother\* OR carer\* OR caregiver\* OR "care giver\*" OR grandparent\* OR grand-parent\* OR grandfather\* OR grandmother\* OR guardian\* OR family OR familial OR families OR home\* OR household\* OR house-hold\*)

S3. DE "Family" OR DE "Family Members" OR DE "Parents" OR DE "Mothers" OR DE "Fathers" OR DE "Adolescent Fathers" OR DE "Adolescent Mothers" OR DE "Grandparents" OR DE "Family Relations" OR DE "Parent Child Relations" OR DE "Father Child Relations" OR DE "Mother Child Relations" OR DE "Parenting" OR DE "Parenting Skills" OR DE "Parenting Style" OR DE "Parental Attitudes" OR DE "Parental Involvement" OR DE "Parent Child Communication" OR DE "Father Child Communication" OR DE "Mother Child Communication" OR DE "Caregivers"

S4. S1 OR S2 OR S3

S5. TI ("young adult\*" OR "young people" OR "young person\*" OR youngster\* OR youth\* OR juvenile\* OR teen\* OR preteen\* OR child\* OR minor\* OR adolescen\* OR pubescen\* OR student\* OR underage\* OR "under age\*")

S6. AB ("young adult\*" OR "young people" OR "young person\*" OR youngster\* OR youth\* OR juvenile\* OR teen\* OR preteen\* OR child\* OR minor\* OR adolescen\* OR pubescen\* OR student\* OR underage\* OR "under age\*")

S7. DE "Adult Offspring" OR DE "Offspring" OR DE "Adolescent Behavior" OR DE "Adolescent Development" OR DE "Adolescent Psychology" OR DE "Adolescent Psychiatry" OR DE "Child Psychiatry" OR DE "Child Psychology"

S8. S5 OR S6 OR S7

S9. TI (parasuicid\* OR para-suicid\* OR nonsuicid\* OR non-suicid\* OR overdos\* OR "over

- dose\*" OR "self harm\*" OR "self hurt\*" OR "self mutilat\*" OR "self injur\*" OR "self damag\*" OR "self inflict\*" OR "self destruct\*" OR "self violen\*" OR "self-directed violen\*" OR "self immolat\*" OR "self poison\*" OR "auto mutilat\*" OR automutilat\* OR "self cut\*" OR "self burn\*" OR "self bit\*" OR "self abus\*" OR "self hit\*" OR "head bang\*" OR headbang\* OR "self wound\*")
- S10. AB (parasuicid\* OR para-suicid\* OR nonsuicid\* OR non-suicid\* OR overdos\* OR "over dose\*" OR "self harm\*" OR "self hurt\*" OR "self mutilat\*" OR "self injur\*" OR "self damag\*" OR "self inflict\*" OR "self destruct\*" OR "self violen\*" OR "self-directed violen\*" OR "self immolat\*" OR "self poison\*" OR "auto mutilat\*" OR automutilat\* OR "self cut\*" OR "self burn\*" OR "self bit\*" OR "self abus\*" OR "self hit\*" OR "head bang\*" OR headbang\* OR "self wound\*")
- S11. DE "Attempted Suicide" OR DE "Suicidal Ideation" OR DE "Self-Destructive Behavior" OR DE "Self-Injurious Behavior" OR DE "Suicidal Behavior" OR DE "Head Banging" OR DE "Self-Inflicted Wounds" OR DE "Self-Mutilation" OR DE "Self-Poisoning" OR DE "Suicidal Behavior" OR DE "Youth Suicide" OR DE "Self-Injurious Behavior" OR DE "Suicidality"
- S12. S9 OR S10 OR S11
- S13. TI (interview OR interviews) OR AB (interview OR interviews) OR TI qualitative OR AB qualitative OR TX experience OR TX experiences
- S14. DE "Qualitative Methods" OR DE "Qualitative Measures" OR DE "Grounded Theory" OR DE "Phenomenology" OR DE "Interpretative Phenomenological Analysis" OR DE "Narrative Analysis" OR DE "Thematic Analysis" OR DE "Interviews" OR DE "Semi-Structured Interview" OR DE "Focus Group Interview" OR DE "Focus Group" OR DE "Cognitive Interview" OR DE "Intake Interview" OR DE "Mixed Methods Research" OR DE "Group Discussion" OR DE "Observation Methods"
- S15. S13 OR S14
- S16. S4 AND S8 AND S12 AND S15
- S17. Limit to English
- 873 records retrieved

**Appendix 8. ProQuest search strategy** (5 selected databases: APA PsycArticles, ERIC, PTSDpubs, Publicly Available Content Database, SIRS Issues Researcher)

1. ti,ab(parent\* OR father\* OR mother\* OR carer\* OR caregiver\* OR "care giver" OR "care givers" OR grandparent\* OR grand-parent\* OR grandfather\* OR grandmother\* OR guardian\* OR family OR familial OR families OR home\* OR household\* OR household\*)
2. MESH(Parents OR Fathers OR Mothers OR Family OR Caregivers OR legal guardians OR Family Relations OR Parent-Child Relations OR Father-Child Relations OR Mother-Child Relations OR Parenting)
3. 1 OR 2
4. ti,ab("young adult" OR "young adulthood" OR "young adults" OR "young people" OR "young person" OR "young persons" OR youngster\* OR youth\* OR juvenile\* OR teen\* OR preteen\* OR child\* OR minor\* OR adolescen\* OR pubescen\* OR student\* OR underage\* OR "under age\*")

5. MESH(Child OR Adolescent OR Young Adult OR Psychology, Child OR Adolescent Development OR Psychology, Adolescent OR Adolescent Psychiatry OR Adolescent Behavior)
  6. 4 OR 5
  7. ti,ab("suicide ideation" OR "suicidal ideation" OR "suicide attempt" OR "suicidal attempt" OR parasuicid\* OR para-suicid\* OR nonsuicid\* OR non-suicid\* OR overdos\* OR "over dose\*" OR "self harm\*" OR "self hurt\*" OR "self mutilat\*" OR "self injur\*" OR "self damag\*" OR "self inflict\*" OR "self destruct\*" OR "self violen\*" OR "self directed violen\*" OR "self immolat\*" OR "self poison\*" OR "auto mutilat\*" OR automutilat\* OR "self cut\*" OR "self burn\*" OR "self bit\*" OR "self abus\*" OR "self hit\*" OR "head bang\*" OR headbang\* OR "self wound\*")
  8. MESH(Self-Injurious Behavior OR Drug Overdose)
  9. 7 OR 8
  10. ti,ab(qualitative OR interview OR interviews) OR experience OR experiences
  11. MESH(Qualitative Research OR interviews)
  12. 10 OR 11
  13. 3 AND 6 AND 9 AND 12
  14. Limit to English
- 931 records retrieved

#### **Appendix 9. Google Scholar strategy**

Intitle: ((parents OR caregivers OR guardians) + ("young people" OR children OR adolescents) + ("self harm" OR "self mutilation" OR "self injury" OR "self injurious" OR "self immolation") + (qualitative OR experiences OR interview))

53 records retrieved

#### **Appendix 10. Opengrey search strategy (<http://www.greynet.org/>)**

"self harm" OR "self mutilation" OR "self injury" OR "self injurious" OR "self immolation", any field
